# Supplementary material for: Manipulating Endoplasmic Reticulum-Plasma Membrane Tethering in Plants Through Fluorescent Protein Complementation
Source: Front Plant Sci. 2019 May 22;10:635. doi: 10.3389/fpls.2019.00635 (PMC6547045; doi:10.3389/fpls.2019.00635)
Supplement: Supplementary Table S1 — Amino acid sequences and other details of protein fusions used in this study. [file Table_1.XLSX]

## Sheet: Sheet1
Supplementary Table S1. Amino acid sequences and other details of protein fusions used in this study.
Protein	ACCESSION/ TAIR	Region	Residues	Size (aa)	Cellular localization N.benthamiana leaf cortical cells	Notes	Fusions and constructs used in the study, Gateway® compatible (the position of "-" indicates the direction of FPs fused to the markers )
Subcellular markers							VenusN-	-VenusN	VenusC-	-VenusC	YFP-	-YFP	-YFPn	YFPc-	tagRFP-	-tagRFP	-GFP
FLS2	AT5G46330.1	FL	MKLLSKTFLILTLTFFFFGIALAKQSFEPEIEALKSFKNGISNDPLGVLSDWTIIGSLRHCNWTGITCDSTGHVVSVSLLEKQLEGVLSPAIANLTYLQVLDLTSNSFTGKIPAEIGKLTELNQLILYLNYFSGSIPSGIWELKNIFYLDLRNNLLSGDVPEEICKTSSLVLIGFDYNNLTGKIPECLGDLVHLQMFVAAGNHLTGSIPVSIGTLANLTDLDLSGNQLTGKIPRDFGNLLNLQSLVLTENLLEGDIPAEIGNCSSLVQLELYDNQLTGKIPAELGNLVQLQALRIYKNKLTSSIPSSLFRLTQLTHLGLSENHLVGPISEEIGFLESLEVLTLHSNNFTGEFPQSITNLRNLTVLTVGFNNISGELPADLGLLTNLRNLSAHDNLLTGP…	1173	PM	Gómez-Gómez and Boller, 2000		pDONR207 / pmAEV		pDONR207 / pmAEV		pDONR207 / pmAEV	pDONR207 / pmAEV
StRem1.3	NP_001274989	FL	MAELEAKKVEIVDPAPPAPGPVEAPKEVVADEKAIVAPALPPPAEEKEKPDDSKALVVVETKAPEPADEKKEGSIDRDAVLARVATEKRVSLIKAWEESEKSKAENKAQKKVSAIGAWENSKKANLEAELKKMEEQLEKKKAEYTEKMKNKIALLHKEAEEKRAMIEAKRGEDLLKAEELAAKYRATGTAPKKILGIF	198	PM	Perraki et al., 2012	pDONR207 / pmAEV		pDONR207 / pmAEV		pDONR207 / pmAEV			pDONR207 / pmAEV
StRem1.3*		FL	MAELEAKKVEIVDPAPPAPGPVEAPKEVVADEKAIVAPALPPPAEEKEKPDDSKALVVVETKAPEPADEKKEGSIDRDAVLARVATEKRVSLIKAWEESEKSKAENKAQKKVSAIGAWENSKKANLEAELKKMEEQLEKKKAEYTEKMKNKIALLHKEAEEKRAMIEAKRGEDLLKAEEHHHKSRSTVTSPKKISQQQ	198	Cytoplasm, nuclear	Perraki et al., 2012			pDONR207 / pmAEV		pDONR207 / pmAEV
SYT1	AT2G20990	FL	MGFFSTILGFCGFGVGISLGLVIGYVLFVYLLPNDVKDPEIRSIADQDPKAMLRMLPEIPLWVKNPDFDRVDWINRFLEYMWPYLDKAICKTAKNIAKPIIEEQIPKYKIDSVEFETLTLGSLPPTFQGMKVYLTDEKELIMEPCLKWAANPNILVAIKAFGLKATVQVVDLQVFAQPRITLKPLVPSFPCFANIYVSLMEKPHVDFGLKLGGADLMSIPGLYRFVQEQIKDQVANMYLWPKTLVVPILDPAKAFRRPVGIVHVKVVRAVGLRKKDLMGGADPFVKIKLSEDKIPSKKTTVKHKNLNPEWNEEFKFSVRDPQTQVLEFSVYDWEQVGNPEKMGMNVLALKEMVPDEHKAFTLELRKTLDGGEDGQPPDKYRGKLEVELLYKPFTEEEMP…	541	ER-PM tether	Pérez-Sancho et al., 2015		pDONR207 / pmAEV		pDONR207 / pmAEV		pDONR207 / pmAEV				pDONR207 / pmAEV
SYT1n	AT2G20990	1-243	MGFFSTILGFCGFGVGISLGLVIGYVLFVYLLPNDVKDPEIRSIADQDPKAMLRMLPEIPLWVKNPDFDRVDWINRFLEYMWPYLDKAICKTAKNIAKPIIEEQIPKYKIDSVEFETLTLGSLPPTFQGMKVYLTDEKELIMEPCLKWAANPNILVAIKAFGLKATVQVVDLQVFAQPRITLKPLVPSFPCFANIYVSLMEKPHVDFGLKLGGADLMSIPGLYRFVQEQIKDQVANMYLWPKT	243	ER membrane	Pérez-Sancho et al., 2015		pDONR207 / pmAEV		pDONR207 / pmAEV		pDONR207 / pmAEV
SYT1-C2AC2B	AT2G20990	244 -541	LVVPILDPAKAFRRPVGIVHVKVVRAVGLRKKDLMGGADPFVKIKLSEDKIPSKKTTVKHKNLNPEWNEEFKFSVRDPQTQVLEFSVYDWEQVGNPEKMGMNVLALKEMVPDEHKAFTLELRKTLDGGEDGQPPDKYRGKLEVELLYKPFTEEEMPKGFEETQAVQKAPEGTPAAGGMLVVIVHSAEDVEGKHHTNPYVRIYFKGEERKTKHVKKNRDPRWNEEFTFMLEEPPVREKLHVEVLSTSSRIGLLHPKETLGYVDIPVVDVVNNKRMNQKFHLIDSKNGKIQIELEWRTAS	298	PM (mainly), cytoplasm, nuclear	Pérez-Sancho et al., 2015			pDONR207 / pmAEV
AtFlotillin1	AT5G25250	FL	MFKVARASQYLAITGAGIEDIKLSKKSWVFPWQSCTVFDVSPVNYTFKVQAMSAEKLPFVLPAVFTIGPRVDDDDALILYARLISPHDKDSNHVHELVEGVIEGETRVLAASMTMEEIFKGTKEFKKEVFDKVQLELNQFGLVIYNANVKQLVDVPGHEYFSYLGQKTQMEAANQARIDVSEAKMKGEIGAKERTGLTLQNAAKIDAESKIISMQRQGEGTKEEIKVRTEVKVFENQKEADVAKANAELAMKKAAWTKDAQVAEVEATKAVALREAELQTQVEKMNALTRTEKLKAEFLSKASVEYETKVQEANWELYNKQKQAEAVLYEKQKQAEAQKAQADAAFYSKQKEAEGLVALASAQGTYLRTLLDAVQNDYSCLRDFLMINNGIYQEIAKTN…	470	PM	Jarsch et al., 2014										pDONR207 / pmAEV
ACK6	AT4G28540	302 - 479	MSSARSHSSTHERHRTGKPGMGAGPSAEKPERISVGNIRDKFSGAVEAFARRNVRGPSPHQNHTRHRTLDEIPSMKPAVNMVSEKGRNTSRYGSASRRAVASGSRPSSSGEQRESRDSSRVASSGGGVRPSVFQRTQAAAAVSGYESKTASAFNRDRVAASRTARDEALRSFELLSIRK	178	Microtubule	Ben-Nissan et al., 2008									pDONR207 / pmAEV
AtFimbrin1	AT4G26700	350 - 604	MEIVEGSSTLNLAFVAQIFHERNGLNKDGKYAFAEMMTEDVETCRDERCYRLWINSLGIDSYVNNVFEDVRNGWILLEVLDKVSPSSVNWKHASKPPIKMPFRKVENCNQVIKIGKQLKFSLVNVAGNDIVQGNKKLILGLLWQLMRFHMLQLLKSLRSRTLGKEMTDADILSWANRKVRTMGRKLQIESFKDKSLSSGLFFLNLLWAVEPRVVNWNLVTKGETDDEKRLNATYIVSVARKLGCSVFLLPEDIVEVNQKMILILTASIMYWSLQRHSRESSDSSSTQSTTTTCTSTASSPAPSVTEEEEVSSLSGEVTSLAVGDAVSEITTVSE	333	Actin	Wang et al., 2004										pDONR207 / pmAEV
BIK1	At2g39660	FL	MGSCFSSRVKADIFHNGKSSDLYGLSLSSRKSSSTVAAAQKTEGEILSSTPVKSFTFNELKLATRNFRPDSVIGEGGFGCVFKGWLDESTLTPTKPGTGLVIAVKKLNQEGFQGHREWLTEINYLGQLSHPNLVKLIGYCLEDEHRLLVYEFMQKGSLENHLFRRGAYFKPLPWFLRVNVALDAAKGLAFLHSDPVKVIYRDIKASNILLDADYNAKLSDFGLARDGPMGDLSYVSTRVMGTYGYAAPEYMSSGHLNARSDVYSFGVLLLEILSGKRALDHNRPAKEENLVDWARPYLTSKRKVLLIVDNRLDTQYLPEEAVRMASVAVQCLSFEPKSRPTMDQVVRALQQLQDNLGKPSQTNPVKDTKKLGFKTGTTKSSEKRFTQKPFGRHLV	395	PM	Lu et al., 2010		pDONR207 / pmAEV				pDONR207 / pmAEV
PBS1	AT5G13160	FL	MGCSCDSSDDKNVDSNHGKKSTVSNNSGSGGKSSKTNGGSKRRDGGAAHTARAAATMNHDTGGGGRVYKGRDSTGVVAVKDRNGGNRVVMSHHNVNGYCADGDRVYMGSDHHDDKADWNMRMKAAGAAKGHDKANVYRDKSSNDGHKSDGAKGTGDKSHVSTRVMGTYGYCAYAMTGTVKSDVYSGVVTGRKADSMHGNVAWARNDRRKKADRKGRTRAYAAVASMCAATRADVVTASYANAYDSKDDSRRNRDRGARTRNDDGGGSGSKDGSKDSRTARNRDNRRAVAAKMWGSRKRRSGTSSNSTG	308	PM	Qi et al., 2014		pDONR207 / pmAEV				pDONR207 / pmAEV
CPK21	AT4G04720	FL	MGCFSSKHRKTQNDGGEKSIPINPVQTHVVPEHRKPQTPTPKPMTQPIHQQISTPSSNPVSVRDPDTILGKPFEDIRKFYSLGKELGRGQFGITYMCKEIGTGNTYACKSILKRKLISKQDKEDVKREIQIMQYLSGQPNIVEIKGAYEDRQSIHLVMELCAGGELFDRIIAQGHYSERAAAGIIRSIVNVVQICHFMGVVHRDLKPENFLLSSKEENAMLKATDFGLSVFIEEGKVYRDIVGSAYYVAPEVLRRSYGKEIDIWSAGVILYILLSGVPPFWAENEKGIFDEVIKGEIDFVSEPWPSISESAKDLVRKMLTKDPKRRITAAQVLEHPWIKGGEAPDKPIDSAVLSRMKQFRAMNKLKKLALKVIAESLSEEEIKGLKTMFANIDTDKSGT…	531	PM	Asai et al., 2013		pDONR207 / pmAEV				pDONR207 / pmAEV
EFR	AT5G20480	FL	MKLSFSLVFNALTLLLQVCIFAQARFSNETDMQALLEFKSQVSENNKREVLASWNHSSPFCNWIGVTCGRRRERVISLNLGGFKLTGVISPSIGNLSFLRLLNLADNSFGSTIPQKVGRLFRLQYLNMSYNLLEGRIPSSLSNCSRLSTVDLSSNHLGHGVPSELGSLSKLAILDLSKNNLTGNFPASLGNLTSLQKLDFAYNQMRGEIPDEVARLTQMVFFQIALNSFSGGFPPALYNISSLESLSLADNSFSGNLRADFGYLLPNLRRLLLGTNQFTGAIPKTLANISSLERFDISSNYLSGSIPLSFGKLRNLWWLGIRNNSLGNNSSSGLEFIGAVANCTQLEYLDVGYNRLGGELPASIANLSTTLTSLFLGQNLISGTIPHDIGNLVSLQELS…	1031	PM	Zipfel et al., 2006		pDONR207 / pmAEV				pDONR207 / pmAEV
BAK1	AT4G33430.1	FL	MERRLMIPCFFWLILVLDLVLRVSGNAEGDALSALKNSLADPNKVLQSWDATLVTPCTWFHVTCNSDNSVTRVDLGNANLSGQLVMQLGQLPNLQYLELYSNNITGTIPEQLGNLTELVSLDLYLNNLSGPIPSTLGRLKKLRFLSQKVVSPNRCYVILLDEKVFSWRLGCCIIWSILIMSFRKRNQNSILVRLNNNSLSGEIPRSLTAVLTLQVLDLSNNPLTGDIPVNGSFSLFTPISFANTKLTPLPASPPPPISPTPPSPAGSNRITGAIAGGVAAGAALLFAVPAIALAWWRRKKPQDHFFDVPAEEDPEVHLGQLKRFSLRELQVASDNFSNKNILGRGGFGKVYKGRLADGTLVAVKRLKEERTQGGELQFQTEVEMISMAVHRNLLRLRGF…	662	PM, though slight cell death observed	Heese et al., 2007		pDONR207 / pmAEV				pDONR207 / pmAEV
BRI1	AT4G39400.1	FL	MKTFSSFFLSVTTLFFFSFFSLSFQASPSQSLYREIHQLISFKDVLPDKNLLPDWSSNKNPCTFDGVTCRDDKVTSIDLSSKPLNVGFSAVSSSLLSLTGLESLFLSNSHINGSVSGFKCSASLTSLDLSRNSLSGPVTTLTSLGSCSGLKFLNVSSNTLDFPGKVSGGLKLNSLEVLDLSANSISGANVVGWVLSDGCGELKHLAISGNKISGDVDVSRCVNLEFLDVSSNNFSTGIPFLGDCSALQHLDISGNKLSGDFSRAISTCTELKLLNISSNQFVGPIPPLPLKSLQYLSLAENKFTGEIPDFLSGACDTLTGLDLSGNHFYGAVPPFFGSCSLLESLALSSNNFSGELPMDTLLKMRGLKVLDLSFNEFSGELPESLTNLSASLLTLDLSS…	1196	PM	Russinova et al., 2004		pDONR207 / pmAEV				pDONR207 / pmAEV
ERec	AT2G26330.1	FL	MALFRDIVLLGFLFCLSLVATVTSEEGATLLEIKKSFKDVNNVLYDWTTSPSSDYCVWRGVSCENVTFNVVALNLSDLNLDGEISPAIGDLKSLLSIDLRGNRLSGQIPDEIGDCSSLQNLDLSFNELSGDIPFSISKLKQLEQLILKNNQLIGPIPSTLSQIPNLKILDLAQNKLSGEIPRLIYWNEVLQYLGLRGNNLVGNISPDLCQLTGLWYFDVRNNSLTGSIPETIGNCTAFQVLDLSYNQLTGEIPFDIGFLQVATLSLQGNQLSGKIPSVIGLMQALAVLDLSGNLLSGSIPPILGNLTFTEKLYLHSNKLTGSIPPELGNMSKLHYLELNDNHLTGHIPPELGKLTDLFDLNVANNDLEGPIPDHLSSCTNLNSLNVHGNKFSGTIPRAF…	976	PM	Bemis et al., 2013		pDONR207 / pmAEV				pDONR207 / pmAEV
SYP21	AT5G16830	FL	MSFQDLEAGTRSPAPNRFTGGRQQRPSSRGDPSQEVAAGIFRISTAVNSFFRLVNSIGTPKDTLELRDKLQKTRLQISELVKNTSAKLKEASEADLHGSASQIKKIADAKLAKDFQSVLKEFQKAQRLAAEREITYTPVVTKEIPTSYNAPELDTESLRISQQQALLLQSRRQEVVFLDNEITFNEAIIEEREQGIREIEDQIRDVNGMFKDLALMVNHQGNIVDDISSNLDNSHAATTQATVQLRKAAKTQRSNSSLTCLLILIFGIVLLIVIIVVLV	279	MVB, tonoplast	Foresti et al., 2006	pDONR207 / pmAEV				pDONR207 / pmAEV
VTI11	AT5G39510	FL	MSDVFDGYERQYCELSASLSKKCSSAISLDGEQKKQKLSEIKSGLENAEVLIRKMDLEARTLPPNLKSSLLVKLREFKSDLNNFKTEVKRITSGQLNAAARDELLEAGMADTKTASADQRARLMMSTERLGRTTDRVKDSRRTMMETEEIGVSILQDLHGQRQSLLRAHETLHGVDDNIGKSKKILTDMTRRMNKNKWTIGAIIIALIAAIFIILYFKLTK	221	Golgi, MVB, tonoplast	Sanmartín et al., 2007	pDONR207 / pmAEV				pDONR207 / pmAEV
SYP61	AT1G28490	FL	MSSAQDPFYIVKEEIQDSIDKLQSTFHKWERISPDMGDQAHVAKELVATCGSIEWQVDELEKAITVAAKDPSWYGIDEAELEKRRRWTSNARTQVRNVKSGVLAGKVSSGAGHASEVRRELMRMPNSGEASRYDQYGGRDDDGFVQSESDRQMLLIKQQDEELDELSKSVQRIGGVGLTIHDELVAQERIIDELDTEMDSTKNRLEFVQKKVGMVMKKAGAKGQMMMICFLLVLFIILFVLVFLT	245	TGN/EE	Hachez et al., 2014	pDONR207 / pmAEV				pDONR207 / pmAEV
VAMP727	AT3G54300	FL	MSQKGLIYSFVAKGTVVLAEHTPYSGNFSTIAVQCLQKLPTNSSKYTYSCDGHTFNFLVDNGFVFLVVADESTGRSVPFVFLERVKEDFKKRYEASIKNDERHPLADEDEDDDLFGDRFSVAYNLDREFGPILKEHMQYCMSHPEEMSKLSKLKAQITEVKGIMMDNIEKVLDRGEKIELLVDKTENLQFQADSFQRQGRQLRRKMWLQSLQMKLMVAGAVFSFILIVWVVACGGFKCSS	240	Endosomal organelle (partially MVBs), tonoplast	Ebine et al., 2008	pDONR207 / pmAEV				pDONR207 / pmAEV
SNAP33	AT5G61210	FL	MFGLRKSPANLPKHNSVDLKSSKPNPFDSDDESDNKHTLNPSKRTTSEPSLADMTNPFGGERVQKGDSSSSKQSLFSNSKYQYKNNFRDSGGIENQSVQELEGYAVYKAEETTKSVQGCLKVAEDIRSDATRTLVMLHDQGEQITRTHHKAVEIDHDLSRGEKLLGSLGGMFSKTWKPKKTRPINGPVVTRDDSPTRRVNHLEKREKLGLNSAPRGQSRTREPLPESADAYQRVEMEKAKQDDGLSDLSDILGELKNMAVDMGSEIEKQNKGLDHLHDDVDELNFRVQQSNQRGRRLLGK	300	PM (not visible by regular FPs-tagged localization analysis), cytoplasm (mainly), nuclear	Kargul et al., 2001		pDONR207 / pmAEV				pDONR207 / pmAEV
AtDMP1	AT3G21520.1	FL	MSETSLLIPKTNSPASSENMANTNKSLTGLESLIKLLPTGTLFIYLLLNPVLTNDGECSTGNKVMSSILVALCSFSCVFSCFTDSFKGVDGSRKFGIVTKKGLWTYAEPGSVDLSKYKLRIADFVHAGFVLAVFGTLVLLDANTASCFYPRFRETQKTLVMALPPAVGVASATIFALFPSKRSGIGYAPIAEEVGAEEETKKASVSA	207	MVBs, tonoplast (mainly)	Kasaras and Kunze, 2017		pDONR207 / pmAEV									pDONR207 / pmAEV
AtTPK1	AT5G55630	FL	MSSDAARTPLLPTEKIDTMAQDFNLNSRTSSSRKRRLRRSRSAPRGDCMYNDDVKIDEPPPHPSKIPMFSDLNPNLRRVIMFLALYLTIGTLCFYLVRDQISGHKTSGVVDALYFCIVTMTTVGYGDLVPNSSASRLLACAFVFSGMVLVGHLLSRAADYLVEKQEALLVRAFHLRQSFGPTDILKELHTNKLRYKCYATCLVLVVLFIVGTIFLVMVEKMPVISAFYCVCSTVTTLGYGDKSFNSEAGRLFAVFWILTSSICLAQFFLYVAELNTENKQRALVKWVLTRRITNNDLEAADLDEDGVVGAAEFIVYKLKEMGKIDEKDISGIMDEFEQLDYDESGTLTTSDIVLAQTTSQIQR	363	MVBs, tonoplast (mainly)	Maîtrejean et al., 2011		pDONR207 / pmAEV									pDONR207 / pmAEV
SLAH3	AT5G24030	FL	MEEKPNYVIQVEEELPTLLRKATTEEMVGFDNYKENGHPFPHSISRFHPSHASTTTLNGQETSRSIDTMEAHHHNYNETTPWTHQRKPSISMPTSPNVLMISDPTTSLSSENHKNSGSTGKSVKFLSQPMTKVSSLYIESGNGDDDRRQSHDNHHHHLHRQHQSGHHQNQNQAANKLKDNRYNSFKTWSGKLERQFTRKPASVEPEAPNRNNQNLNTNEAMPVDRYYDALEGPELETLRPQEEIVLPNDKKWPFLLRYPISTFGMCLGVSSQAIMWKTLATAEPTKFLHVPLWINQGLWFISVALILTIATIYLLKIILFFEAVRREYYHPIRINFFFAPFISLLFLALGVPPSIITDLPHFLWYLLMFPFICLELKIYGQWMSGGQRRLSRVANPTNH…	635	PM	Demir et al., 2013		pDONR207 / pmAEV				pDONR207 / pmAEV
PIP1	AT3G61430	FL	MEGKEEDVRVGANKFPERQPIGTSAQSDKDYKEPPPAPFFEPGELSSWSFWRAGIAEFIATFLFLYITVLTVMGVKRSPNMCASVGIQGIAWAFGGMIFALVYCTAGISGGHINPAVTFGLFLARKLSLTRALYYIVMQCLGAICGAGVVKGFQPKQYQALGGGANTVAHGYTKGSGLGAEIIGTFVLVYTVFSATDAKRNARDSHVPILAPLPIGFAVFLVHLATIPITGTGINPARSLGAAIIYNKDHSWDDHWVFWVGPFIGAALAALYHVVVIRAIPFKSRS	286	endosomal organelle	Wudick et al., 2009		pDONR207 / pmAEV				pDONR207 / pmAEV
FAPP1a-PH ( derived from FAPP1-PH )	AAG15199	1-99	MEGVLYKWTNYLTGWQPRWFVLDNGILSYYDSQDDVCKGSKGSIKMAVCAIKVASADNTRMELIIPGEQHFYMKAVNAAERQRWLVALGSSKACLTDTR	99	PM	He et al., 2011			pDONR207 / pmAEV			pDONR207 / pmAEV
FAPP1a-PH*			MEGVLYEWTNYLTGWQPAWFVLDNGILSYYDSQDDVCKGSKGSIKMAVCAIKVASADNTRMELIIPGEQHFYMKAVNAAERQRWLVALGSSKACLTDTR	99	Cytoplasm, nuclear	He et al., 2011			pDONR207 / pmAEV			pDONR207 / pmAEV
PLCδ1-PH	AAH50382	1 - 174	MDSGRDFLTLHGLQDDEDLQALLKGSQLLKVKSSSWRRERFYKLQEDCKTIWQESRKVMRTPESQLFSIEDIQEVRMGHRTEGLEKFARDVPEDRCFSIVFKDQRNTLDLIAPSPADAQHWVLGLHKIIHHSGSMDQRQKLQHWIHSCLRKADKNKDNKMSFKELQNFLKELNI	174	PM (not visible by regular FPs-tagged localization analysis), cytoplasm (mainly), nuclear	Yagisawa et al., 1998				pDONR207 / pmAEV		pDONR207 / pmAEV
PLCδ1-PH*		1 - 174	MDSGRDFLTLHGLQDDEDLQALLKGSQLLAVESSSWRREAFYKLQEDCKTIWQESRKVMRTPESQLFSIEDIQEVRMGHRTEGLEKFARDVPEDRCFSIVFKDQRNTLDLIAPSPADAQHWVLGLHKIIHHSGSMDQRQKLQHWIHSCLRKADKNKDNKMSFKELQNFLKELNI	174	Cytoplasm, nuclear	Yagisawa et al., 1998				pDONR207 / pmAEV		pDONR207 / pmAEV
tagRFP-HDEL			MGYMCIKISFCVMCVLGLVIVGDVAYAQDTSLYKKAGSSRMVSKGEELIKENMHMKLYMEGTVNNHHFKCTSEGEGKPYEGTQTMRIKVVEGGPLPFAFDILATSFMYGSRTFINHTQGIPDFFKQSFPEGFTWERVTTYEDGGVLTATQDTSLQDGCLIYNVKIRGVNFPSNGPVMQKKTLGWEANTEMLYPADGGLEGRSDMALKLVGGGHLICNFKTTYRSKKPAKNLKMPGVYYVDHRLERIKEADKETYVEQHEVAVARYCDLPSKLGHKLNSRGAFVY	283	The lumen of endoplasmic reticulum	Matsushima et al., 2002										pDONR207 / psAEV
VAM7-PX	NP_011303	1 - 134	MAANSVGKMSEKLRIKVDDVKINPKYVLYGVSTPNKRLYKRYSEFWKLKTRLERDVGSTIPYDFPEKPGVLDRRWQRRYDDPEMIDERRIGLERFLNELYNDRFDSRWRDTKIAQDFLQLSKPNVSQEKSQQHL	134	MVBs, tonoplast	Kale et al., 2010			pDONR207 / pmAEV
VAM7-PX*		1 - 134	MAANSVGKMSEKLRIKVDDVKINPKYVLYGVSTPNKRLYKEYAEFWKLKTRLERDVGSTIPYDFPEKPGVLDRRWQRRYDDPEMIDERRIGLERFLNELYNDRFDSRWRDTKIAQDFLQLSKPNVSQEKSQQHL	134	Cytoplasm, nuclear	Lee et al., 2006			pDONR207 / pmAEV
Hrs-2xFYVE	NP_032270	147- 223	MEFESDAMFAAERAPDWVDAEECHRCRVQFGVVTRKHHCRACGQIFCGKCSSKYSTIPKFGIEKEVRVCEPCYEQLNKKAQGQGSESDAMFAAERAPDWVDAEECHRCRVQFGVVTRKHHCRACGQIFCGKCSSKYSTIPKFGIEKEVRVCEPCYEQLNKKAVDLQPK	168	MVBs, tonoplast	Vermeer et al., 2006			pDONR207 / pmAEV
Hrs-2xFYVE*		147- 223	MEFESDAMFAAERAPDWVDAEECHRCRVQFGVVTSSSSCSACGQIFCGKCSSKYSTIPKFGIEKEVRVCEPCYEQLNKKAQGQGSESDAMFAAERAPDWVDAEECHRCRVQFGVVTSSSSCSACGQIFCGKCSSKYSTIPKFGIEKEVRVCEPCYEQLNKKAVDLQPK	168	Cytoplasm, nuclear	Kutateladze and Overduin, 2001; Pankiv et al., 2010			pDONR207 / pmAEV
